# Supplementary material for: Testicular Transcriptome of Males and Pseudo-Males Provides Important New Insight into Sex Reversal of Rana dybowskii
Source: MDPI journal article supplement (doi:10.3390/ani12202887), 2022-10-21
Supplement: s1 [file s1]

Table S1

Primers used for quantitative real-time PCR

| Gene                            | Primers (5'-3')                                         | Size (bp) | TM (°C) |
|---------------------------------|---------------------------------------------------------|-----------|---------|
| <i><math>\beta</math>-actin</i> | F: GGATCAGCAAGCAGGAGTA<br>R: GAAAGCCATGCCAGTGAT         | 117       | 54.0    |
| <i>Dmrt1</i>                    | F:TAAGCAAGCCTCGCAAACCT<br>R:ACTGACATTCCCGCCACATA        | 150       | 60.3    |
| <i>3<math>\beta</math>-HSD</i>  | F:GTATCACCGACGCCATCCAATCAC<br>R:CACCTGCTGACCATCCTGAACAC | 133       | 65.0    |
| <i>CYP26B1</i>                  | F:CCTCCTCCTCCTCCTCCTCCTC<br>R:AGCACCGACACCAGATCAAAGC    | 92        | 64.0    |

F, forward primer; R, reverse primer. *Dmrt1*, doublesex and mab-3 related transcription factor 1; *3  $\beta$*

*-HSD*, 3-beta-hydroxysteroid dehydrogenase; *CYP26B1*, cytochrome P450 26B1.
